# Supplementary material for: Association of Childhood Exposure to Nitrogen Dioxide and Polygenic Risk Score for Schizophrenia With the Risk of Developing Schizophrenia
Source: PubMed Central journal article supplement (PMC6827271; doi:10.1001/jamanetworkopen.2019.14401), 2019-11-01
Supplement: jamanetwopen-2-e1914401-s001.pdf [file jamanetwopen-2-e1914401-s001.pdf]

## Supplementary Online Content

Horsdal HT, Agerbo E, McGrath JJ, et al. Association of childhood exposure to nitrogen dioxide and polygenic risk score for schizophrenia with the risk of developing schizophrenia. *JAMA Netw Open*. 2019;2(11):e1914401. doi:10.1001/jamanetworkopen.2019.14401

**eFigure.** Flow-chart for the Selection of the Final Study Population

**eTable 1.** Baseline Characteristics of the 23,355 Individuals in the Case-Cohort Study

**eTable 2.** Risk for Schizophrenia According to Mean Daily NO<sub>2</sub> Exposure During Childhood and Polygenic Risk Score After Excluding Cryptic-Related Individuals and Ancestral Outliers (N=22,755)

**eTable 3.** Risk for Schizophrenia According to Mean Daily NO<sub>2</sub> Exposure During Childhood and Polygenic Risk Score Including Batches in the Models (N=23,355)

This supplementary material has been provided by the authors to give readers additional information about their work.

**eFigure.** Flow-chart for the selection of the final study population.

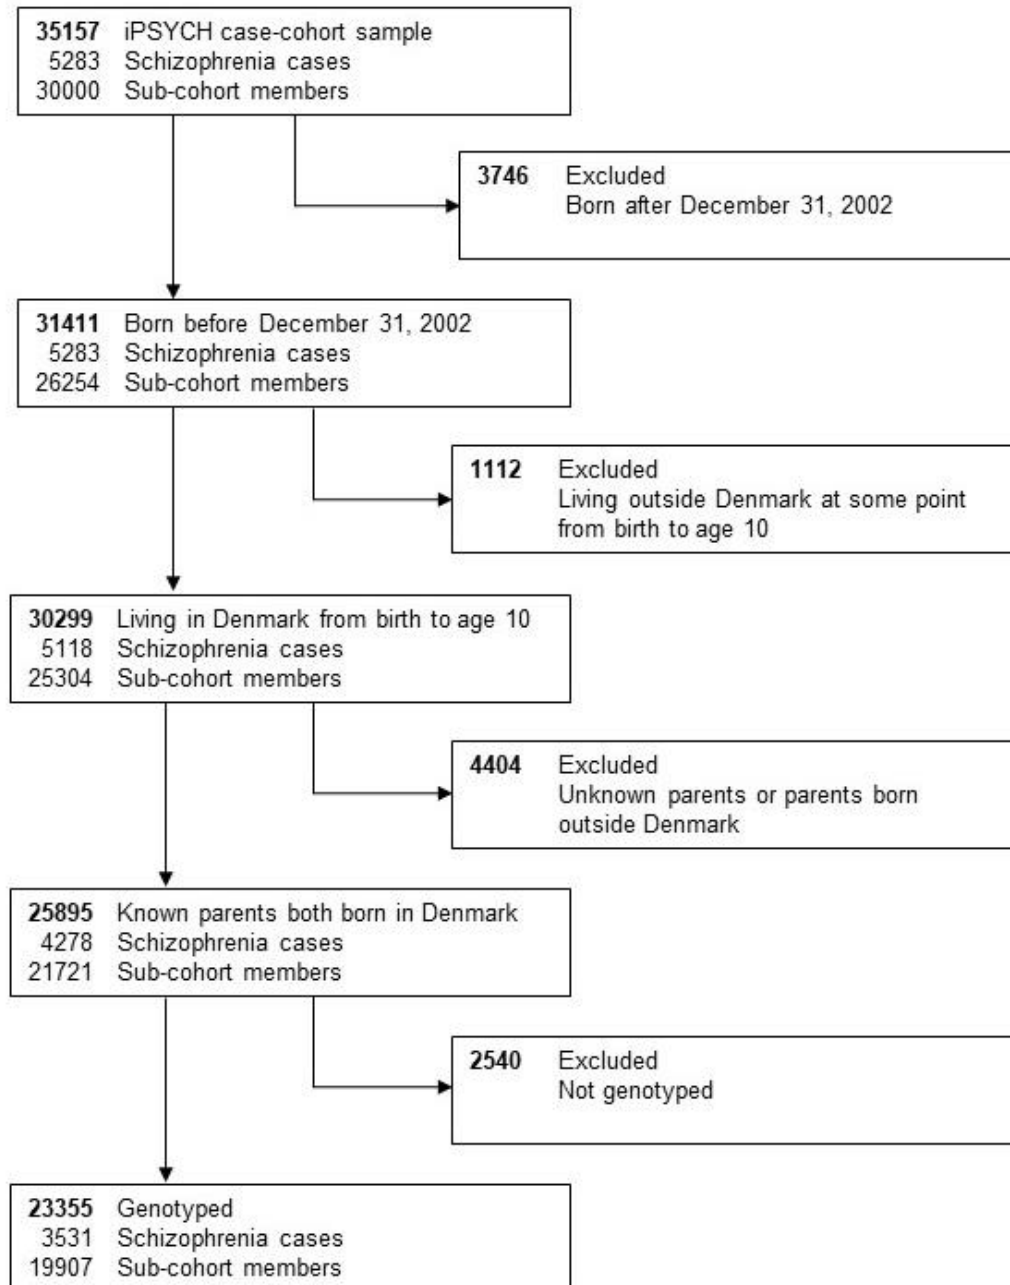

**eTable 1. Baseline characteristics of the 23,355 individuals in the case-cohort study.**

| <b>Baseline characteristics</b>                       | <b>Schizophrenia<br/>(n=3,531)</b> | <b>Sub-cohort<br/>(n=19,907)</b> |
|-------------------------------------------------------|------------------------------------|----------------------------------|
| Gender, No. (%)                                       |                                    |                                  |
| Male                                                  | 1,926 (54.55)                      | 10,095 (50.71)                   |
| Female                                                | 1,605 (45.45)                      | 9,812 (49.29)                    |
|                                                       |                                    |                                  |
| Parental psychiatric history, No. (%)                 |                                    |                                  |
| None                                                  | 2,873 (81.37)                      | 17,939 (90.11)                   |
| Any other psychiatric disorder (Other F)              | 396 (11.21)                        | 1,242 (6.24)                     |
| Affective disorders (F30-F39)                         | 97 (2.75)                          | 489 (2.46)                       |
| Schizophrenia or related psychosis (F20-F29)          | 165 (4.67)                         | 237 (1.19)                       |
|                                                       |                                    |                                  |
| Father's highest completed educational level, No. (%) |                                    |                                  |
| Primary school                                        | 1,298 (36.76)                      | 4,594 (23.08)                    |
| High school/vocational training                       | 1,480 (41.91)                      | 9,940 (49.93)                    |
| Higher education                                      | 667 (18.89)                        | 5,119 (25.71)                    |
| Unknown                                               | 86 (2.44)                          | 254 (1.28)                       |
|                                                       |                                    |                                  |
| Mother's highest completed educational level, No. (%) |                                    |                                  |
| Primary school                                        | 1,491 (42.23)                      | 4,995 (25.09)                    |
| High school/vocational training                       | 1,209 (34.24)                      | 8,548 (42.94)                    |
| Higher education                                      | 785 (22.23)                        | 6,257 (31.43)                    |
| Unknown                                               | 46 (1.30)                          | 107 (0.54)                       |
|                                                       |                                    |                                  |
| Father's employment status, No. (%)                   |                                    |                                  |
| Employed                                              | 2,845 (80.57)                      | 18,090 (90.87)                   |
| Unemployed                                            | 320 (9.06)                         | 867 (4.36)                       |
| Outside workforce                                     | 366 (10.37)                        | 950 (4.77)                       |
|                                                       |                                    |                                  |
| Mother's employment status, No. (%)                   |                                    |                                  |
| Employed                                              | 2,466 (69.84)                      | 16,736 (84.07)                   |
| Unemployed                                            | 392 (11.10)                        | 1,251 (6.28)                     |
| Outside workforce                                     | 673 (19.06)                        | 1,920 (9.64)                     |
|                                                       |                                    |                                  |
| Father's income, No. (%)                              |                                    |                                  |
| Lowest quintile                                       | 688 (19.48)                        | 2,309 (11.60)                    |
| Second quintile                                       | 798 (22.60)                        | 3,611 (18.14)                    |
| Third quintile                                        | 749 (21.21)                        | 4,235 (21.27)                    |
| Fourth quintile                                       | 687 (19.46)                        | 4,715 (23.69)                    |
| Highest quintile                                      | 535 (15.15)                        | 4,796 (24.09)                    |
| Unknown                                               | 74 (2.10)                          | 241 (1.21)                       |
|                                                       |                                    |                                  |
| Mother's income, No. (%)                              |                                    |                                  |
| Lowest quintile                                       | 656 (18.58)                        | 2,443 (12.27)                    |
| Second quintile                                       | 859 (24.33)                        | 4,241 (21.30)                    |
| Third quintile                                        | 742 (21.01)                        | 4,418 (22.19)                    |
| Fourth quintile                                       | 684 (19.37)                        | 4,512 (22.67)                    |
| Highest quintile                                      | 562 (15.92)                        | 4,225 (21.22)                    |
| Unknown                                               | 28 (0.79)                          | 68 (0.34)                        |

|                     |               |               |
|---------------------|---------------|---------------|
|                     |               |               |
| Birth year, No. (%) |               |               |
| 1981-1986           | 1,470 (41.63) | 4,460 (22.40) |
| 1987-1991           | 1,453 (41.15) | 4,710 (23.66) |
| 1992-1996           | 562 (15.92)   | 5,075 (25.49) |
| 1997-2002           | 46 (1.30)     | 5,662 (28.44) |

**eTable 2. Risk for Schizophrenia According to Mean Daily NO<sub>2</sub> Exposure During Childhood and Polygenic Risk Score After Excluding Cryptic-Related Individuals and Ancestral Outliers (N=22,755).**

| Model                | Childhood NO <sub>2</sub> exposure, AHR (95% CI) <sup>a</sup> | Polygenic risk score, AHR (95% CI) <sup>b</sup> |
|----------------------|---------------------------------------------------------------|-------------------------------------------------|
| Model 1 <sup>c</sup> | 1.28 (1.20-1.36)                                              | 1.32 (1.26-1.37)                                |
| Model 2 <sup>d</sup> | 1.28 (1.20-1.37)                                              | 1.29 (1.24-1.35)                                |
| Model 3 <sup>e</sup> | 1.25 (1.17-1.34)                                              | 1.29 (1.24-1.35)                                |

Abbreviations: AHR, adjusted hazard ratio; CI, confidence intervals; NO<sub>2</sub>, nitrogen dioxide.

<sup>a</sup>The estimate for childhood NO<sub>2</sub> measure the increased risk of schizophrenia associated with a 10 µg/m<sup>3</sup> increase in mean daily exposure to NO<sub>2</sub> during the first 10 years of life.

<sup>b</sup>The estimate for polygenic risk score measure the increased risk of schizophrenia associated with a one standard deviation increase in polygenic risk score. The estimate was additionally adjusted for first 10 genomic principal components.

<sup>c</sup>Adjusted for age, gender, birth year.

<sup>d</sup>Adjusted for age, gender, birth year, parental history of mental disorder, and parental socioeconomic position.

<sup>e</sup>Adjusted for age, gender, birth year, parental history of mental disorder, parental socioeconomic position. Hazard ratio for childhood NO<sub>2</sub> exposure was also adjusted for the polygenic risk score and hazard ratio for polygenic risk score was also adjusted for childhood NO<sub>2</sub> exposure.

Note. This study was designed and conducted from an epidemiological perspective following a representative sample of native Danes (defined as individuals born in Denmark by Danish born parents) for schizophrenia diagnosis (Table 2). The finding in this Table show that when we further implemented a genetic perspective by excluding cryptic-related individuals and ancestral outliers, identical finding were observed.

**eTable 3. Risk for Schizophrenia According to Mean Daily NO<sub>2</sub> Exposure During Childhood and Polygenic Risk Score Including Batches in the Models (N=23,355).**

| Model                | Childhood NO <sub>2</sub> exposure, AHR (95% CI) <sup>a</sup> | Polygenic risk score, AHR (95% CI) <sup>b</sup> |
|----------------------|---------------------------------------------------------------|-------------------------------------------------|
| Model 1 <sup>c</sup> | 1.26 (1.19-1.34)                                              | 1.31 (1.26-1.36)                                |
| Model 2 <sup>d</sup> | 1.27 (1.19-1.35)                                              | 1.31 (1.22-1.41)                                |
| Model 3 <sup>e</sup> | 1.29 (1.14-1.46)                                              | 1.30 (1.21-1.39)                                |

Abbreviations: AHR, adjusted hazard ratio; CI, confidence intervals; NO<sub>2</sub>, nitrogen dioxide.

<sup>a</sup>The estimate for childhood NO<sub>2</sub> measure the increased risk of schizophrenia associated with a 10 µg/m<sup>3</sup> increase in mean daily exposure to NO<sub>2</sub> during the first 10 years of life.

<sup>b</sup>The estimate for polygenic risk score measure the increased risk of schizophrenia associated with a one standard deviation increase in polygenic risk score. The estimate was additionally adjusted for first 10 genomic principal components and batches.

<sup>c</sup>Adjusted for age, gender, birth year.

<sup>d</sup>Adjusted for age, gender, birth year, parental history of mental disorder, and parental socioeconomic position.

<sup>e</sup>Adjusted for age, gender, birth year, parental history of mental disorder, parental socioeconomic position. Hazard ratio for childhood NO<sub>2</sub> exposure was also adjusted for the polygenic risk score and hazard ratio for polygenic risk score was also adjusted for childhood NO<sub>2</sub> exposure.

Note. The finding in this Table were expected since batch and birth year are strongly correlated ( $\rho=-0.85$ ,  $p<0.001$ ).
